# Supplementary material for: Reconstructing the Invasive History and Potential Distribution Prediction of Amaranthus palmeri in China
Source: MDPI journal article supplement (doi:10.3390/agronomy13102498), 2023-09-28
Supplement: s1 [file s1]

## Supplementary Materials

**Supplementary Table S1:** Species data and environmental variables source

| Data sources                         | Website links                                                                                                                                                                                                                                                                                                                                                                                                                               | Years                      | spatial resolution |
|--------------------------------------|---------------------------------------------------------------------------------------------------------------------------------------------------------------------------------------------------------------------------------------------------------------------------------------------------------------------------------------------------------------------------------------------------------------------------------------------|----------------------------|--------------------|
| <i>A. palmeri</i> occurrence records | GBIF ( <a href="https://www.gbif.org/">https://www.gbif.org/</a> , accessed April 2023)<br>CHV ( <a href="https://www.cvh.ac.cn/">https://www.cvh.ac.cn/</a> , accessed April 2023)<br>PPBC ( <a href="http://ppbc.iplant.cn/">http://ppbc.iplant.cn/</a> , accessed April 2023)<br>WOS ( <a href="https://www.webofscience.com/">https://www.webofscience.com/</a> )<br>CNKI ( <a href="https://www.cnki.net/">https://www.cnki.net/</a> ) |                            | /                  |
| 19 bioclimatic factors               | <a href="https://worldclim.org/data/worldclim21.html">https://worldclim.org/data/worldclim21.html</a><br><br><a href="https://worldclim.org/data/cmip6/cmip6climate.html">https://worldclim.org/data/cmip6/cmip6climate.html</a>                                                                                                                                                                                                            | 1970-2000<br><br>2020-2060 | 2.5 minutes        |
| 12 wind speed                        | <a href="https://worldclim.org/data/worldclim21.html">https://worldclim.org/data/worldclim21.html</a>                                                                                                                                                                                                                                                                                                                                       | 1970-2000                  | 2.5 minutes        |
| Elevation                            | <a href="https://worldclim.org/data/worldclim21.html">https://worldclim.org/data/worldclim21.html</a>                                                                                                                                                                                                                                                                                                                                       | 2020                       | 2.5 minutes        |
| 18 soil factors                      | <a href="https://www.fao.org/soils-portal/data-hub/soil-maps-and-databases/harmonized-world-soil-database-v12/en/">https://www.fao.org/soils-portal/data-hub/soil-maps-and-databases/harmonized-world-soil-database-v12/en/</a>                                                                                                                                                                                                             | 1971-1981                  | 2.5 minutes        |
| Human footprint index                | <a href="https://sedac.ciesin.columbia.edu/data/set/wildareas-v3-2009-human-footprint">https://sedac.ciesin.columbia.edu/data/set/wildareas-v3-2009-human-footprint</a>                                                                                                                                                                                                                                                                     | 2009                       | 2.5 minutes        |

**Supplementary Table S2:** Environmental variables for the potential geographical distribution of *Amaranthus palmeri*.

| Variable | Description                                      | Unit |
|----------|--------------------------------------------------|------|
| bio1     | Annual mean temperature                          | °C   |
| bio2     | Mean diurnal temperature range                   | °C   |
| bio3     | Isothermality (Bio2/Bio7)×100                    | -    |
| bio4     | Temperature seasonality (standard deviation×100) | °C   |
| bio5     | Max temperature of warmest month                 | °C   |
| bio6     | Min temperature of coldest month                 | °C   |
| bio7     | Temperature annual range                         | °C   |
| bio8     | Mean temperature of wettest quarter              | °C   |
| bio9     | Mean temperature of driest quarter               | °C   |
| bio10    | Mean temperature of warmest quarter              | °C   |
| bio11    | Mean temperature of coldest quarter              | °C   |
| bio12    | Annual precipitation                             | mm   |
| bio13    | Precipitation of wettest month                   | mm   |
| bio14    | precipitation of driest month                    | mm   |

|                             |                                                       |                       |
|-----------------------------|-------------------------------------------------------|-----------------------|
| bio15                       | Precipitation seasonality (coefficient of variation×1 | -                     |
| bio16                       | Precipitation of wettest quarter                      | mm                    |
| bio17                       | Precipitation of driest quarter                       | mm                    |
| bio18                       | Precipitation of warmest quarter                      | mm                    |
| bio19                       | Precipitation of coldest quarter                      | mm                    |
| Altitude                    | Altitude                                              | m                     |
| Slope                       | Slope                                                 |                       |
| Aspect                      | Aspect                                                | %                     |
| ACC_PROP                    | Soil Available Water Content Range                    | -                     |
| SWR                         | Soil water regime                                     | -                     |
| T_OC                        | Topsoil Organic Carbon                                | % weight              |
| T_bulk                      | Topsil reference bulk density                         | Kg·dm <sup>-3</sup>   |
| T_PH_H2O                    | Topsoil pH (H <sub>2</sub> O)                         | -log(H <sup>+</sup> ) |
| T_sand                      | Topsoil Sand Fraction                                 | % wt                  |
| T_CaCO <sub>3</sub>         | Topsoil calcium carbonate                             | % weight              |
| T_CaCO <sub>4</sub>         | Topsoil gypsum                                        | % weight              |
| T_cec_clay                  | Topsoil cec (clay)                                    | cmol·kg <sup>-1</sup> |
| T_cec_soil                  | Topsoil cec (soil)                                    | cmol·kg <sup>-1</sup> |
| T_clay                      | Topsoil clay fraction                                 | % wt                  |
| T_ece                       | Topsoil salinity (Elco)                               | ds·m <sup>-1</sup>    |
| T_teb                       | Topsoil teb                                           | cmol·kg <sup>-1</sup> |
| T_esp                       | Topsoil sodicity                                      | %                     |
| T_gravel                    | Topsoil gravel content                                | % vol                 |
| T_silt                      | Topsoil silt fraction                                 | % wt                  |
| T_texture                   | Topsoil texture                                       | code                  |
| T_bs                        | Topsoil base saturation                               | %                     |
| Wind_1                      | Wind speed in January                                 | m·s <sup>-1</sup>     |
| Wind_2                      | Wind speed in February                                | m·s <sup>-1</sup>     |
| Wind_3                      | Wind speed in March                                   | m·s <sup>-1</sup>     |
| Wind_4                      | Wind speed in April                                   | m·s <sup>-1</sup>     |
| Wind_5                      | Wind speed in May                                     | m·s <sup>-1</sup>     |
| Wind_6                      | Wind speed in June                                    | m·s <sup>-1</sup>     |
| Wind_7                      | Wind speed in July                                    | m·s <sup>-1</sup>     |
| Wind_8                      | Wind speed in August                                  | m·s <sup>-1</sup>     |
| Wind_9                      | Wind speed in September                               | m·s <sup>-1</sup>     |
| Wind_10                     | Wind speed in October                                 | m·s <sup>-1</sup>     |
| Wind_11                     | Wind speed in November                                | m·s <sup>-1</sup>     |
| Wind_12                     | Wind speed in December                                | m·s <sup>-1</sup>     |
| Human<br>influence<br>index | Human Influence Index                                 | -                     |

---

**Supplementary Table S3: The Pearson correlation coefficient of bioclimatic variables**

|                     | Add_prop | aspect | T_swr  | T_bs   | T_bulk | T_CaC<br>O <sub>3</sub> | T_CaC<br>O <sub>4</sub> | T_cec_clay | T_cec_soil | T_clay | T_oc   |
|---------------------|----------|--------|--------|--------|--------|-------------------------|-------------------------|------------|------------|--------|--------|
| Add_prop            | 1.000    | 0.001  | 0.010  | 0.042  | 0.013  | 0.061                   | 0.011                   | 0.021      | -0.007     | 0.039  | -0.006 |
| aspect              | 0.001    | 1.000  | -0.001 | 0.000  | 0.002  | 0.000                   | 0.000                   | 0.001      | -0.001     | -0.001 | -0.002 |
| T_swr               | 0.010    | -0.001 | 1.000  | 0.040  | -0.027 | -0.147                  | -0.033                  | -0.036     | -0.010     | 0.011  | 0.038  |
| T_bs                | 0.042    | 0.000  | 0.040  | 1.000  | -0.053 | 0.086                   | 0.027                   | 0.153      | 0.067      | 0.001  | 0.030  |
| T_bulk              | 0.013    | 0.002  | -0.027 | -0.053 | 1.000  | 0.107                   | 0.026                   | -0.017     | -0.759     | -0.273 | -0.869 |
| T_CaCO <sub>3</sub> | 0.061    | 0.000  | -0.147 | 0.086  | 0.107  | 1.000                   | 0.280                   | 0.109      | -0.010     | 0.082  | -0.103 |
| T_CaCO <sub>4</sub> | 0.011    | 0.000  | -0.033 | 0.027  | 0.026  | 0.280                   | 1.000                   | 0.021      | -0.014     | 0.021  | -0.029 |
| T_cec_clay          | 0.021    | 0.001  | -0.036 | 0.153  | -0.017 | 0.109                   | 0.021                   | 1.000      | 0.227      | -0.238 | 0.031  |
| T_cec_soil          | -0.007   | -0.001 | -0.010 | 0.067  | -0.759 | -0.010                  | -0.014                  | 0.227      | 1.000      | 0.347  | 0.858  |
| T_clay              | 0.039    | -0.001 | 0.011  | 0.001  | -0.273 | 0.082                   | 0.021                   | -0.238     | 0.347      | 1.000  | 0.141  |
| T_oc                | -0.006   | -0.002 | 0.038  | 0.030  | -0.869 | -0.103                  | -0.029                  | 0.031      | 0.858      | 0.141  | 1.000  |
| T_ece               | 0.024    | 0.000  | -0.061 | 0.038  | 0.013  | 0.214                   | 0.311                   | 0.027      | -0.005     | 0.030  | -0.031 |
| T_teb               | 0.017    | -0.001 | -0.113 | 0.129  | -0.412 | 0.315                   | 0.043                   | 0.251      | 0.701      | 0.464  | 0.434  |
| T_esp               | 0.032    | 0.000  | -0.064 | 0.049  | 0.065  | 0.291                   | 0.272                   | 0.006      | -0.045     | 0.076  | -0.085 |
| T_gravel            | -0.097   | 0.000  | -0.092 | -0.099 | 0.017  | 0.137                   | 0.005                   | -0.077     | -0.091     | -0.119 | -0.074 |
| T_sand              | 0.040    | 0.000  | 0.027  | -0.050 | 0.400  | -0.111                  | -0.042                  | 0.068      | -0.514     | -0.721 | -0.263 |
| T_silt              | -0.083   | 0.000  | -0.047 | 0.072  | -0.331 | 0.092                   | 0.043                   | 0.098      | 0.435      | 0.209  | 0.242  |
| T_texture           | -0.016   | -0.001 | 0.006  | 0.010  | -0.299 | 0.080                   | 0.028                   | -0.201     | 0.371      | 0.847  | 0.148  |
| bio1                | 0.893    | 0.001  | -0.031 | 0.076  | -0.001 | 0.008                   | 0.002                   | 0.006      | 0.002      | 0.011  | 0.002  |
| bio2                | 0.893    | 0.001  | -0.031 | 0.076  | -0.001 | 0.008                   | 0.002                   | 0.006      | 0.002      | 0.011  | 0.002  |
| bio3                | 0.167    | 0.000  | 0.017  | 0.053  | 0.151  | 0.310                   | 0.084                   | -0.293     | -0.179     | 0.318  | -0.212 |
| bio4                | 0.039    | 0.001  | -0.088 | 0.131  | -0.083 | 0.002                   | -0.011                  | 0.347      | 0.177      | -0.290 | 0.139  |
| bio5                | 0.201    | -0.001 | -0.170 | 0.056  | 0.174  | 0.315                   | 0.100                   | -0.180     | -0.121     | 0.254  | -0.149 |
| bio6                | 0.045    | -0.001 | 0.009  | -0.085 | 0.120  | 0.106                   | 0.044                   | -0.338     | -0.175     | 0.322  | -0.156 |
| bio7                | 0.134    | 0.001  | -0.148 | 0.152  | -0.057 | 0.049                   | 0.001                   | 0.354      | 0.166      | -0.286 | 0.123  |
| bio8                | 0.141    | -0.001 | -0.040 | -0.093 | 0.126  | 0.089                   | 0.028                   | -0.259     | -0.110     | 0.243  | -0.095 |
| bio9                | 0.084    | -0.001 | -0.072 | -0.007 | 0.131  | 0.210                   | 0.078                   | -0.279     | -0.160     | 0.300  | -0.157 |
| bio10               | 0.168    | -0.001 | -0.132 | 0.022  | 0.168  | 0.290                   | 0.094                   | -0.228     | -0.134     | 0.282  | -0.152 |
| bio11               | 0.072    | -0.001 | -0.012 | -0.084 | 0.130  | 0.120                   | 0.047                   | -0.334     | -0.179     | 0.316  | -0.161 |
| bio12               | 0.004    | -0.001 | 0.215  | -0.134 | -0.071 | -0.253                  | -0.073                  | -0.335     | -0.060     | 0.269  | 0.020  |
| bio13               | 0.032    | -0.001 | 0.123  | -0.185 | -0.016 | -0.229                  | -0.067                  | -0.347     | -0.083     | 0.267  | -0.021 |
| bio14               | -0.043   | -0.001 | 0.273  | -0.005 | -0.122 | -0.178                  | -0.054                  | -0.102     | 0.030      | 0.118  | 0.083  |
| bio15               | 0.317    | 0.000  | -0.120 | 0.106  | 0.144  | 0.096                   | 0.053                   | -0.116     | -0.121     | 0.008  | -0.127 |
| bio16               | 0.030    | -0.001 | 0.132  | -0.177 | -0.025 | -0.238                  | -0.070                  | -0.355     | -0.082     | 0.271  | -0.014 |
| bio17               | -0.038   | -0.001 | 0.273  | -0.015 | -0.120 | -0.185                  | -0.057                  | -0.123     | 0.022      | 0.133  | 0.079  |
| bio18               | 0.050    | -0.001 | 0.241  | -0.014 | -0.086 | -0.258                  | -0.084                  | -0.247     | -0.027     | 0.187  | 0.046  |
| bio19               | -0.052   | -0.001 | 0.157  | -0.161 | -0.066 | -0.152                  | -0.038                  | -0.214     | -0.032     | 0.191  | 0.022  |
| dem                 | 0.143    | 0.000  | -0.079 | 0.035  | 0.017  | 0.039                   | -0.004                  | -0.011     | -0.070     | -0.041 | -0.086 |
| human               | 0.897    | 0.001  | 0.000  | 0.076  | 0.002  | 0.031                   | 0.004                   | 0.020      | 0.007      | 0.025  | 0.004  |
| slope               | 0.894    | 0.001  | -0.034 | 0.074  | 0.008  | 0.017                   | 0.003                   | 0.004      | 0.000      | 0.013  | -0.002 |

| <b>T_pH_H2O</b>           | 0.032  | 0.001  | -0.214 | 0.106        | 0.243  | 0.566  | 0.135         | 0.303  | -0.016 | 0.068  | -0.261 |
|---------------------------|--------|--------|--------|--------------|--------|--------|---------------|--------|--------|--------|--------|
| <b>wind1</b>              | -0.220 | 0.000  | 0.000  | 0.000        | -0.060 | 0.062  | 0.003         | 0.217  | 0.045  | -0.150 | 0.013  |
| <b>wind2</b>              | -0.196 | 0.001  | -0.037 | 0.047        | -0.051 | 0.118  | 0.018         | 0.212  | 0.045  | -0.147 | 0.006  |
| <b>wind3</b>              | -0.186 | 0.001  | -0.074 | 0.052        | -0.047 | 0.166  | 0.027         | 0.237  | 0.054  | -0.170 | 0.010  |
| <b>wind4</b>              | -0.162 | 0.001  | -0.092 | 0.083        | -0.055 | 0.190  | 0.028         | 0.273  | 0.082  | -0.181 | 0.025  |
| <b>wind5</b>              | -0.177 | 0.001  | -0.103 | 0.070        | -0.050 | 0.191  | 0.034         | 0.279  | 0.092  | -0.203 | 0.032  |
| <b>wind6</b>              | -0.221 | 0.001  | -0.117 | 0.048        | -0.025 | 0.198  | 0.050         | 0.259  | 0.074  | -0.198 | 0.015  |
| <b>wind7</b>              | -0.248 | 0.001  | -0.095 | 0.037        | -0.008 | 0.210  | 0.069         | 0.221  | 0.044  | -0.172 | -0.012 |
| <b>wind8</b>              | -0.265 | 0.001  | -0.071 | 0.034        | -0.024 | 0.166  | 0.053         | 0.217  | 0.042  | -0.172 | -0.004 |
| <b>wind9</b>              | -0.267 | 0.001  | -0.027 | 0.036        | -0.048 | 0.105  | 0.021         | 0.230  | 0.052  | -0.202 | 0.022  |
| <b>wind10</b>             | -0.270 | 0.001  | -0.005 | 0.056        | -0.080 | 0.045  | -0.006        | 0.242  | 0.069  | -0.205 | 0.046  |
| <b>wind11</b>             | -0.246 | 0.001  | 0.015  | 0.052        | -0.084 | 0.036  | -0.009        | 0.233  | 0.061  | -0.175 | 0.037  |
| <b>wind12</b>             | -0.237 | 0.001  | 0.005  | 0.037        | -0.068 | 0.038  | -0.006        | 0.216  | 0.048  | -0.163 | 0.020  |
|                           | T_ece  | T_teb  | T_esp  | T_gra<br>vel | T_sand | T_silt | T_textu<br>re | bio1   | bio2   | bio3   | bio4   |
| <b>Add_prop</b>           | 0.024  | 0.017  | 0.032  | -0.097       | 0.040  | -0.083 | -0.016        | 0.893  | 0.893  | 0.167  | 0.039  |
| <b>aspect</b>             | 0.000  | -0.001 | 0.000  | 0.000        | 0.000  | 0.000  | -0.001        | 0.001  | 0.001  | 0.000  | 0.001  |
| <b>T_swr</b>              | -0.061 | -0.113 | -0.064 | -0.092       | 0.027  | -0.047 | 0.006         | -0.031 | -0.031 | 0.017  | -0.088 |
| <b>T_bs</b>               | 0.038  | 0.129  | 0.049  | -0.099       | -0.050 | 0.072  | 0.010         | 0.076  | 0.076  | 0.053  | 0.131  |
| <b>T_bulk</b>             | 0.013  | -0.412 | 0.065  | 0.017        | 0.400  | -0.331 | -0.299        | -0.001 | -0.001 | 0.151  | -0.083 |
| <b>T_CaCO<sub>3</sub></b> | 0.214  | 0.315  | 0.291  | 0.137        | -0.111 | 0.092  | 0.080         | 0.008  | 0.008  | 0.310  | 0.002  |
| <b>T_CaCO<sub>4</sub></b> | 0.311  | 0.043  | 0.272  | 0.005        | -0.042 | 0.043  | 0.028         | 0.002  | 0.002  | 0.084  | -0.011 |
| <b>T_cec_clay</b>         | 0.027  | 0.251  | 0.006  | -0.077       | 0.068  | 0.098  | -0.201        | 0.006  | 0.006  | -0.293 | 0.347  |
| <b>T_cec_soil</b>         | -0.005 | 0.701  | -0.045 | -0.091       | -0.514 | 0.435  | 0.371         | 0.002  | 0.002  | -0.179 | 0.177  |
| <b>T_clay</b>             | 0.030  | 0.464  | 0.076  | -0.119       | -0.721 | 0.209  | 0.847         | 0.011  | 0.011  | 0.318  | -0.290 |
| <b>T_oc</b>               | -0.031 | 0.434  | -0.085 | -0.074       | -0.263 | 0.242  | 0.148         | 0.002  | 0.002  | -0.212 | 0.139  |
| <b>T_ece</b>              | 1.000  | 0.087  | 0.514  | -0.019       | -0.044 | 0.038  | 0.029         | 0.002  | 0.002  | 0.109  | 0.002  |
| <b>T_teb</b>              | 0.087  | 1.000  | 0.144  | 0.083        | -0.561 | 0.412  | 0.456         | 0.002  | 0.002  | 0.031  | 0.130  |
| <b>T_esp</b>              | 0.514  | 0.144  | 1.000  | -0.008       | -0.021 | -0.032 | 0.018         | 0.006  | 0.006  | 0.216  | -0.093 |
| <b>T_gravel</b>           | -0.019 | 0.083  | -0.008 | 1.000        | -0.055 | 0.182  | -0.004        | -0.020 | -0.020 | 0.014  | 0.050  |
| <b>T_sand</b>             | -0.044 | -0.561 | -0.021 | -0.055       | 1.000  | -0.822 | -0.845        | 0.012  | 0.012  | -0.030 | -0.020 |
| <b>T_silt</b>             | 0.038  | 0.412  | -0.032 | 0.182        | -0.822 | 1.000  | 0.515         | -0.026 | -0.026 | -0.203 | 0.269  |
| <b>T_texture</b>          | 0.029  | 0.456  | 0.018  | -0.004       | -0.845 | 0.515  | 1.000         | -0.005 | -0.005 | 0.226  | -0.193 |
| <b>bio1</b>               | 0.002  | 0.002  | 0.006  | -0.020       | 0.012  | -0.026 | -0.005        | 1.000  | 1.000  | 0.023  | -0.542 |
| <b>bio2</b>               | 0.002  | 0.002  | 0.006  | -0.020       | 0.012  | -0.026 | -0.005        | 1.000  | 1.000  | 0.023  | -0.161 |
| <b>bio3</b>               | 0.109  | 0.031  | 0.216  | 0.014        | -0.030 | -0.203 | 0.226         | 0.023  | 0.023  | 1.000  | -0.631 |
| <b>bio4</b>               | 0.002  | 0.130  | -0.093 | 0.050        | -0.020 | 0.269  | -0.193        | -0.542 | -0.161 | -0.631 | 1.000  |
| <b>bio5</b>               | 0.092  | 0.086  | 0.240  | -0.106       | 0.055  | -0.285 | 0.095         | 0.967  | 0.656  | 0.122  | -0.320 |
| <b>bio6</b>               | 0.028  | -0.072 | 0.155  | -0.074       | 0.013  | -0.285 | 0.193         | 0.974  | 0.492  | 0.453  | -0.710 |
| <b>bio7</b>               | 0.018  | 0.152  | -0.064 | 0.037        | 0.017  | 0.215  | -0.207        | -0.365 | 0.116  | -0.558 | 0.957  |
| <b>bio8</b>               | 0.028  | -0.020 | 0.104  | -0.167       | 0.050  | -0.270 | 0.093         | 0.945  | 0.558  | -0.026 | -0.300 |
| <b>bio9</b>               | 0.060  | -0.022 | 0.211  | -0.052       | 0.019  | -0.274 | 0.178         | 0.918  | 0.526  | 0.549  | -0.729 |
| <b>bio10</b>              | 0.084  | 0.056  | 0.234  | -0.105       | 0.036  | -0.282 | 0.124         | 0.977  | 0.612  | 0.127  | -0.349 |

|            |        |        |        |        |        |        |        |        |        |        |        |
|------------|--------|--------|--------|--------|--------|--------|--------|--------|--------|--------|--------|
| bio11      | 0.034  | -0.066 | 0.162  | -0.077 | 0.029  | -0.302 | 0.183  | 0.980  | 0.539  | 0.459  | -0.696 |
| bio12      | -0.083 | -0.219 | -0.110 | -0.143 | -0.080 | -0.112 | 0.192  | 0.539  | 0.021  | 0.130  | -0.555 |
| bio13      | -0.074 | -0.194 | -0.091 | -0.116 | -0.053 | -0.146 | 0.182  | 0.541  | 0.104  | 0.212  | -0.560 |
| bio14      | -0.060 | -0.117 | -0.097 | -0.084 | -0.088 | 0.022  | 0.095  | 0.313  | -0.103 | -0.102 | -0.282 |
| bio15      | 0.042  | -0.001 | 0.067  | 0.079  | 0.108  | -0.158 | -0.010 | 0.285  | 0.285  | 0.440  | -0.013 |
| bio16      | -0.076 | -0.206 | -0.097 | -0.124 | -0.055 | -0.146 | 0.186  | 0.562  | 0.105  | 0.193  | -0.562 |
| bio17      | -0.062 | -0.127 | -0.097 | -0.092 | -0.089 | 0.011  | 0.105  | 0.330  | -0.107 | -0.078 | -0.314 |
| bio18      | -0.087 | -0.182 | -0.131 | -0.159 | -0.066 | -0.063 | 0.138  | 0.517  | 0.100  | -0.081 | -0.355 |
| bio19      | -0.050 | -0.151 | -0.061 | -0.060 | -0.073 | -0.056 | 0.139  | 0.315  | -0.087 | 0.127  | -0.428 |
| dem        | 0.009  | 0.005  | -0.005 | 0.141  | 0.028  | -0.005 | 0.038  | -0.699 | -0.156 | 0.306  | 0.110  |
| human      | 0.011  | 0.015  | 0.017  | -0.058 | 0.018  | -0.043 | -0.009 | 0.983  | 0.983  | 0.169  | 0.058  |
| slope      | 0.003  | 0.004  | 0.007  | -0.036 | 0.016  | -0.032 | -0.006 | 0.987  | 0.987  | 0.028  | 0.053  |
| T_pH_H2O   | 0.161  | 0.449  | 0.330  | 0.209  | -0.125 | 0.127  | 0.045  | 0.007  | 0.007  | 0.268  | 0.036  |
| wind1      | 0.012  | 0.083  | 0.054  | 0.106  | -0.003 | 0.125  | -0.093 | 0.002  | 0.002  | 0.000  | 0.026  |
| wind2      | 0.025  | 0.106  | 0.070  | 0.124  | -0.018 | 0.142  | -0.081 | -0.395 | -0.373 | 0.092  | 0.024  |
| wind3      | 0.034  | 0.128  | 0.074  | 0.154  | -0.020 | 0.165  | -0.094 | -0.401 | -0.353 | 0.122  | 0.061  |
| wind4      | 0.036  | 0.161  | 0.060  | 0.158  | -0.046 | 0.211  | -0.095 | -0.412 | -0.340 | 0.107  | 0.111  |
| wind5      | 0.037  | 0.163  | 0.055  | 0.182  | -0.047 | 0.229  | -0.106 | -0.451 | -0.355 | 0.102  | 0.135  |
| wind6      | 0.045  | 0.151  | 0.080  | 0.213  | -0.033 | 0.206  | -0.102 | -0.451 | -0.363 | 0.134  | 0.109  |
| wind7      | 0.054  | 0.135  | 0.108  | 0.218  | -0.018 | 0.163  | -0.089 | -0.524 | -0.408 | 0.184  | 0.073  |
| wind8      | 0.044  | 0.113  | 0.101  | 0.194  | -0.001 | 0.138  | -0.104 | -0.512 | -0.408 | 0.175  | 0.060  |
| wind9      | 0.023  | 0.086  | 0.066  | 0.165  | 0.018  | 0.136  | -0.135 | -0.512 | -0.399 | 0.150  | 0.065  |
| wind10     | 0.009  | 0.076  | 0.033  | 0.115  | 0.021  | 0.134  | -0.142 | -0.516 | -0.430 | 0.085  | 0.090  |
| wind11     | 0.008  | 0.075  | 0.036  | 0.085  | 0.014  | 0.119  | -0.121 | -0.501 | -0.432 | 0.087  | 0.066  |
| wind12     | 0.006  | 0.072  | 0.039  | 0.103  | 0.001  | 0.128  | -0.103 | -0.417 | -0.414 | 0.032  | 0.044  |
|            | bio5   | bio6   | bio7   | bio8   | bio9   | bio10  | bio11  | bio12  | bio13  | bio14  | bio15  |
| Add_prop   | 0.201  | 0.045  | 0.134  | 0.141  | 0.084  | 0.168  | 0.072  | 0.004  | 0.032  | -0.043 | 0.317  |
| aspect     | -0.001 | -0.001 | 0.001  | -0.001 | -0.001 | -0.001 | -0.001 | -0.001 | -0.001 | -0.001 | 0.000  |
| T_swr      | -0.170 | 0.009  | -0.148 | -0.040 | -0.072 | -0.132 | -0.012 | 0.215  | 0.123  | 0.273  | -0.120 |
| T_bs       | 0.056  | -0.085 | 0.152  | -0.093 | -0.007 | 0.022  | -0.084 | -0.134 | -0.185 | -0.005 | 0.106  |
| T_bulk     | 0.174  | 0.120  | -0.057 | 0.126  | 0.131  | 0.168  | 0.130  | -0.071 | -0.016 | -0.122 | 0.144  |
| T_CaCO3    | 0.315  | 0.106  | 0.049  | 0.089  | 0.210  | 0.290  | 0.120  | -0.253 | -0.229 | -0.178 | 0.096  |
| T_CaCO4    | 0.100  | 0.044  | 0.001  | 0.028  | 0.078  | 0.094  | 0.047  | -0.073 | -0.067 | -0.054 | 0.053  |
| T_cec_clay | -0.180 | -0.338 | 0.354  | -0.259 | -0.279 | -0.228 | -0.334 | -0.335 | -0.347 | -0.102 | -0.116 |
| T_cec_soil | -0.121 | -0.175 | 0.166  | -0.110 | -0.160 | -0.134 | -0.179 | -0.060 | -0.083 | 0.030  | -0.121 |
| T_clay     | 0.254  | 0.322  | -0.286 | 0.243  | 0.300  | 0.282  | 0.316  | 0.269  | 0.267  | 0.118  | 0.008  |
| T_oc       | -0.149 | -0.156 | 0.123  | -0.095 | -0.157 | -0.152 | -0.161 | 0.020  | -0.021 | 0.083  | -0.127 |
| T_ece      | 0.092  | 0.028  | 0.018  | 0.028  | 0.060  | 0.084  | 0.034  | -0.083 | -0.074 | -0.060 | 0.042  |
| T_teb      | 0.086  | -0.072 | 0.152  | -0.020 | -0.022 | 0.056  | -0.066 | -0.219 | -0.194 | -0.117 | -0.001 |
| T_esp      | 0.240  | 0.155  | -0.064 | 0.104  | 0.211  | 0.234  | 0.162  | -0.110 | -0.091 | -0.097 | 0.067  |
| T_gravel   | -0.106 | -0.074 | 0.037  | -0.167 | -0.052 | -0.105 | -0.077 | -0.143 | -0.116 | -0.084 | 0.079  |
| T_sand     | 0.055  | 0.013  | 0.017  | 0.050  | 0.019  | 0.036  | 0.029  | -0.080 | -0.053 | -0.088 | 0.108  |
| T_silt     | -0.285 | -0.285 | 0.215  | -0.270 | -0.274 | -0.282 | -0.302 | -0.112 | -0.146 | 0.022  | -0.158 |

|                            |              |              |              |              |            |              |              |                            |              |              |              |
|----------------------------|--------------|--------------|--------------|--------------|------------|--------------|--------------|----------------------------|--------------|--------------|--------------|
| <b>T_texture</b>           | 0.095        | 0.193        | -0.207       | 0.093        | 0.178      | 0.124        | 0.183        | 0.192                      | 0.182        | 0.095        | -0.010       |
| <b>bio1</b>                | 0.967        | 0.974        | -0.365       | 0.945        | 0.918      | 0.977        | 0.980        | 0.539                      | 0.541        | 0.313        | 0.285        |
| <b>bio2</b>                | 0.656        | 0.492        | 0.116        | 0.558        | 0.526      | 0.612        | 0.539        | 0.021                      | 0.104        | -0.103       | 0.285        |
| <b>bio3</b>                | 0.122        | 0.453        | -0.558       | -0.026       | 0.549      | 0.127        | 0.459        | 0.130                      | 0.212        | -0.102       | 0.440        |
| <b>bio4</b>                | -0.320       | -0.710       | 0.957        | -0.300       | -0.729     | -0.349       | -0.696       | -0.555                     | -0.560       | -0.282       | -0.013       |
| <b>bio5</b>                | 1.000        | 0.888        | -0.121       | 0.970        | 0.827      | 0.997        | 0.901        | 0.431                      | 0.437        | 0.253        | -0.431       |
| <b>bio6</b>                | 0.888        | 1.000        | -0.564       | 0.865        | 0.955      | 0.905        | 0.998        | 0.607                      | 0.601        | 0.355        | -0.351       |
| <b>bio7</b>                | -0.121       | -0.564       | 1.000        | -0.126       | -0.577     | -0.163       | -0.535       | -0.535                     | -0.512       | -0.313       | -0.028       |
| <b>bio8</b>                | 0.970        | 0.865        | -0.126       | 1.000        | 0.756      | 0.976        | 0.876        | 0.472                      | 0.469        | 0.291        | -0.480       |
| <b>bio9</b>                | 0.827        | 0.955        | -0.577       | 0.756        | 1.000      | 0.839        | 0.956        | 0.525                      | 0.527        | 0.286        | -0.278       |
| <b>bio10</b>               | 0.997        | 0.905        | -0.163       | 0.976        | 0.839      | 1.000        | 0.916        | 0.460                      | 0.460        | 0.278        | -0.448       |
| <b>bio11</b>               | 0.901        | 0.998        | -0.535       | 0.876        | 0.956      | 0.916        | 1.000        | 0.589                      | 0.592        | 0.332        | -0.336       |
| <b>bio12</b>               | 0.431        | 0.607        | -0.535       | 0.472        | 0.525      | 0.460        | 0.589        | 1.000                      | 0.913        | 0.746        | -0.332       |
| <b>bio13</b>               | 0.437        | 0.601        | -0.512       | 0.469        | 0.527      | 0.460        | 0.592        | 0.913                      | 1.000        | 0.476        | -0.130       |
| <b>bio14</b>               | 0.253        | 0.355        | -0.313       | 0.291        | 0.286      | 0.278        | 0.332        | 0.746                      | 0.476        | 1.000        | -0.452       |
| <b>bio15</b>               | -0.431       | -0.351       | -0.028       | -0.480       | -0.278     | -0.448       | -0.336       | -0.332                     | -0.130       | -0.452       | 1.000        |
| <b>bio16</b>               | 0.459        | 0.620        | -0.513       | 0.493        | 0.541      | 0.483        | 0.611        | 0.937                      | 0.993        | 0.512        | -0.182       |
| <b>bio17</b>               | 0.262        | 0.378        | -0.345       | 0.302        | 0.309      | 0.288        | 0.354        | 0.780                      | 0.510        | 0.993        | -0.466       |
| <b>bio18</b>               | 0.457        | 0.527        | -0.316       | 0.529        | 0.403      | 0.482        | 0.521        | 0.835                      | 0.784        | 0.621        | -0.313       |
| <b>bio19</b>               | 0.222        | 0.395        | -0.452       | 0.231        | 0.371      | 0.245        | 0.370        | 0.761                      | 0.618        | 0.676        | -0.297       |
| <b>dem</b>                 | -0.736       | -0.632       | 0.043        | -0.764       | -0.551     | -0.754       | -0.623       | -0.366                     | -0.319       | -0.285       | 0.562        |
| <b>human</b>               | 0.113        | -0.003       | 0.118        | 0.072        | 0.026      | 0.087        | 0.015        | -0.016                     | 0.002        | -0.037       | 0.354        |
| <b>slope</b>               | -0.004       | -0.047       | 0.096        | -0.027       | -0.029     | -0.019       | -0.037       | -0.056                     | -0.040       | -0.067       | 0.285        |
| <b>T_pH_H<sub>2</sub>O</b> | 0.280        | 0.058        | 0.094        | 0.056        | 0.157      | 0.240        | 0.078        | -0.442                     | -0.357       | -0.331       | 0.186        |
| <b>wind1</b>               | -0.420       | -0.310       | -0.087       | -0.388       | -0.276     | -0.407       | -0.327       | -0.286                     | -0.335       | -0.097       | 0.001        |
| <b>wind2</b>               | -0.451       | -0.332       | -0.093       | -0.426       | -0.284     | -0.437       | -0.348       | -0.293                     | -0.333       | -0.122       | 0.098        |
| <b>wind3</b>               | -0.447       | -0.349       | -0.049       | -0.424       | -0.292     | -0.435       | -0.363       | -0.320                     | -0.351       | -0.157       | 0.108        |
| <b>wind4</b>               | -0.444       | -0.373       | 0.007        | -0.415       | -0.320     | -0.435       | -0.385       | -0.335                     | -0.357       | -0.185       | 0.100        |
| <b>wind5</b>               | -0.480       | -0.412       | 0.028        | -0.449       | -0.352     | -0.471       | -0.423       | -0.360                     | -0.370       | -0.224       | 0.124        |
| <b>wind6</b>               | -0.486       | -0.403       | -0.004       | -0.461       | -0.336     | -0.477       | -0.415       | -0.377                     | -0.380       | -0.241       | 0.165        |
| <b>wind7</b>               | -0.578       | -0.454       | -0.056       | -0.559       | -0.374     | -0.568       | -0.469       | -0.384                     | -0.382       | -0.262       | 0.251        |
| <b>wind8</b>               | -0.568       | -0.440       | -0.070       | -0.544       | -0.368     | -0.558       | -0.456       | -0.370                     | -0.371       | -0.245       | 0.238        |
| <b>wind9</b>               | -0.568       | -0.444       | -0.061       | -0.533       | -0.383     | -0.558       | -0.459       | -0.353                     | -0.364       | -0.220       | 0.206        |
| <b>wind10</b>              | -0.567       | -0.453       | -0.040       | -0.526       | -0.402     | -0.556       | -0.468       | -0.357                     | -0.385       | -0.202       | 0.144        |
| <b>wind11</b>              | -0.558       | -0.434       | -0.064       | -0.520       | -0.385     | -0.546       | -0.450       | -0.343                     | -0.378       | -0.172       | 0.137        |
| <b>wind12</b>              | -0.471       | -0.355       | -0.081       | -0.433       | -0.320     | -0.457       | -0.372       | -0.305                     | -0.356       | -0.111       | 0.067        |
|                            | <b>bio16</b> | <b>bio17</b> | <b>bio18</b> | <b>bio19</b> | <b>dem</b> | <b>human</b> | <b>slope</b> | <b>T_pH_H<sub>2</sub>O</b> | <b>wind1</b> | <b>wind2</b> | <b>wind3</b> |
| <b>Add_prop</b>            | 0.030        | -0.038       | 0.050        | -0.052       | 0.143      | 0.897        | 0.894        | 0.032                      | -0.220       | -0.196       | -0.186       |
| <b>aspect</b>              | -0.001       | -0.001       | -0.001       | -0.001       | 0.000      | 0.001        | 0.001        | 0.001                      | 0.000        | 0.001        | 0.001        |
| <b>T_swr</b>               | 0.132        | 0.273        | 0.241        | 0.157        | -0.079     | 0.000        | -0.034       | -0.214                     | 0.000        | -0.037       | -0.074       |
| <b>T_bs</b>                | -0.177       | -0.015       | -0.014       | -0.161       | 0.035      | 0.076        | 0.074        | 0.106                      | 0.000        | 0.047        | 0.052        |
| <b>T_bulk</b>              | -0.025       | -0.120       | -0.086       | -0.066       | 0.017      | 0.002        | 0.008        | 0.243                      | -0.060       | -0.051       | -0.047       |
| <b>T_CaCO<sub>3</sub></b>  | -0.238       | -0.185       | -0.258       | -0.152       | 0.039      | 0.031        | 0.017        | 0.566                      | 0.062        | 0.118        | 0.166        |

|                            |        |        |        |        |        |        |        |        |        |        |        |
|----------------------------|--------|--------|--------|--------|--------|--------|--------|--------|--------|--------|--------|
| <b>T_CaCO<sub>4</sub></b>  | -0.070 | -0.057 | -0.084 | -0.038 | -0.004 | 0.004  | 0.003  | 0.135  | 0.003  | 0.018  | 0.027  |
| <b>T_cec_clay</b>          | -0.355 | -0.123 | -0.247 | -0.214 | -0.011 | 0.020  | 0.004  | 0.303  | 0.217  | 0.212  | 0.237  |
| <b>T_cec_soil</b>          | -0.082 | 0.022  | -0.027 | -0.032 | -0.070 | 0.007  | 0.000  | -0.016 | 0.045  | 0.045  | 0.054  |
| <b>T_clay</b>              | 0.271  | 0.133  | 0.187  | 0.191  | -0.041 | 0.025  | 0.013  | 0.068  | -0.150 | -0.147 | -0.170 |
| <b>T_oc</b>                | -0.014 | 0.079  | 0.046  | 0.022  | -0.086 | 0.004  | -0.002 | -0.261 | 0.013  | 0.006  | 0.010  |
| <b>T_ee</b>                | -0.076 | -0.062 | -0.087 | -0.050 | 0.009  | 0.011  | 0.003  | 0.161  | 0.012  | 0.025  | 0.034  |
| <b>T_teb</b>               | -0.206 | -0.127 | -0.182 | -0.151 | 0.005  | 0.015  | 0.004  | 0.449  | 0.083  | 0.106  | 0.128  |
| <b>T_esp</b>               | -0.097 | -0.097 | -0.131 | -0.061 | -0.005 | 0.017  | 0.007  | 0.330  | 0.054  | 0.070  | 0.074  |
| <b>T_gravel</b>            | -0.124 | -0.092 | -0.159 | -0.060 | 0.141  | -0.058 | -0.036 | 0.209  | 0.106  | 0.124  | 0.154  |
| <b>T_sand</b>              | -0.055 | -0.089 | -0.066 | -0.073 | 0.028  | 0.018  | 0.016  | -0.125 | -0.003 | -0.018 | -0.020 |
| <b>T_silt</b>              | -0.146 | 0.011  | -0.063 | -0.056 | -0.005 | -0.043 | -0.032 | 0.127  | 0.125  | 0.142  | 0.165  |
| <b>T_texture</b>           | 0.186  | 0.105  | 0.138  | 0.139  | 0.038  | -0.009 | -0.006 | 0.045  | -0.093 | -0.081 | -0.094 |
| <b>bio1</b>                | 0.562  | 0.330  | 0.517  | 0.315  | -0.699 | 0.983  | 0.987  | 0.007  | 0.002  | -0.395 | -0.401 |
| <b>bio2</b>                | 0.105  | -0.107 | 0.100  | -0.087 | -0.156 | 0.983  | 0.987  | 0.007  | 0.002  | -0.373 | -0.353 |
| <b>bio3</b>                | 0.193  | -0.078 | -0.081 | 0.127  | 0.306  | 0.169  | 0.028  | 0.268  | 0.000  | 0.092  | 0.122  |
| <b>bio4</b>                | -0.562 | -0.314 | -0.355 | -0.428 | 0.110  | 0.058  | 0.053  | 0.036  | 0.026  | 0.024  | 0.061  |
| <b>bio5</b>                | 0.459  | 0.262  | 0.457  | 0.222  | -0.736 | 0.113  | -0.004 | 0.280  | -0.420 | -0.451 | -0.447 |
| <b>bio6</b>                | 0.620  | 0.378  | 0.527  | 0.395  | -0.632 | -0.003 | -0.047 | 0.058  | -0.310 | -0.332 | -0.349 |
| <b>bio7</b>                | -0.513 | -0.345 | -0.316 | -0.452 | 0.043  | 0.118  | 0.096  | 0.094  | -0.087 | -0.093 | -0.049 |
| <b>bio8</b>                | 0.493  | 0.302  | 0.529  | 0.231  | -0.764 | 0.072  | -0.027 | 0.056  | -0.388 | -0.426 | -0.424 |
| <b>bio9</b>                | 0.541  | 0.309  | 0.403  | 0.371  | -0.551 | 0.026  | -0.029 | 0.157  | -0.276 | -0.284 | -0.292 |
| <b>bio10</b>               | 0.483  | 0.288  | 0.482  | 0.245  | -0.754 | 0.087  | -0.019 | 0.240  | -0.407 | -0.437 | -0.435 |
| <b>bio11</b>               | 0.611  | 0.354  | 0.521  | 0.370  | -0.623 | 0.015  | -0.037 | 0.078  | -0.327 | -0.348 | -0.363 |
| <b>bio12</b>               | 0.937  | 0.780  | 0.835  | 0.761  | -0.366 | -0.016 | -0.056 | -0.442 | -0.286 | -0.293 | -0.320 |
| <b>bio13</b>               | 0.993  | 0.510  | 0.784  | 0.618  | -0.319 | 0.002  | -0.040 | -0.357 | -0.335 | -0.333 | -0.351 |
| <b>bio14</b>               | 0.512  | 0.993  | 0.621  | 0.676  | -0.285 | -0.037 | -0.067 | -0.331 | -0.097 | -0.122 | -0.157 |
| <b>bio15</b>               | -0.182 | -0.466 | -0.313 | -0.297 | 0.562  | 0.354  | 0.285  | 0.186  | 0.001  | 0.098  | 0.108  |
| <b>bio16</b>               | 1.000  | 0.547  | 0.806  | 0.641  | -0.344 | 0.001  | -0.042 | -0.382 | -0.344 | -0.344 | -0.363 |
| <b>bio17</b>               | 0.547  | 1.000  | 0.641  | 0.706  | -0.294 | -0.035 | -0.068 | -0.345 | -0.093 | -0.116 | -0.150 |
| <b>bio18</b>               | 0.806  | 0.641  | 1.000  | 0.419  | -0.358 | 0.018  | -0.035 | -0.395 | -0.341 | -0.355 | -0.376 |
| <b>bio19</b>               | 0.641  | 0.706  | 0.419  | 1.000  | -0.229 | -0.046 | -0.057 | -0.316 | -0.099 | -0.102 | -0.127 |
| <b>dem</b>                 | -0.344 | -0.294 | -0.358 | -0.229 | 1.000  | 0.096  | 0.110  | 0.116  | 0.194  | 0.236  | 0.216  |
| <b>human</b>               | 0.001  | -0.035 | 0.018  | -0.046 | 0.096  | 1.000  | 0.988  | 0.021  | 0.002  | -0.142 | -0.135 |
| <b>slope</b>               | -0.042 | -0.068 | -0.035 | -0.057 | 0.110  | 0.988  | 1.000  | 0.012  | 0.002  | -0.074 | -0.069 |
| <b>T_pH_H<sub>2</sub>O</b> | -0.382 | -0.345 | -0.395 | -0.316 | 0.116  | 0.021  | 0.012  | 1.000  | 0.199  | 0.236  | 0.271  |
| <b>wind1</b>               | -0.344 | -0.093 | -0.341 | -0.099 | 0.194  | 0.002  | 0.002  | 0.199  | 1.000  | 0.968  | 0.936  |
| <b>wind2</b>               | -0.344 | -0.116 | -0.355 | -0.102 | 0.236  | -0.142 | -0.074 | 0.236  | 0.968  | 1.000  | 0.973  |
| <b>wind3</b>               | -0.363 | -0.150 | -0.376 | -0.127 | 0.216  | -0.135 | -0.069 | 0.271  | 0.936  | 0.973  | 1.000  |
| <b>wind4</b>               | -0.369 | -0.176 | -0.377 | -0.150 | 0.206  | -0.115 | -0.055 | 0.289  | 0.899  | 0.943  | 0.981  |
| <b>wind5</b>               | -0.384 | -0.213 | -0.406 | -0.173 | 0.220  | -0.119 | -0.052 | 0.294  | 0.859  | 0.902  | 0.956  |
| <b>wind6</b>               | -0.396 | -0.233 | -0.431 | -0.185 | 0.230  | -0.141 | -0.059 | 0.317  | 0.854  | 0.895  | 0.942  |
| <b>wind7</b>               | -0.401 | -0.252 | -0.457 | -0.183 | 0.314  | -0.160 | -0.052 | 0.332  | 0.825  | 0.868  | 0.913  |
| <b>wind8</b>               | -0.391 | -0.236 | -0.441 | -0.172 | 0.298  | -0.173 | -0.056 | 0.301  | 0.845  | 0.880  | 0.918  |

|                           |              |              |              |              |              |              |               |               |               |       |       |
|---------------------------|--------------|--------------|--------------|--------------|--------------|--------------|---------------|---------------|---------------|-------|-------|
| <b>wind9</b>              | -0.381       | -0.210       | -0.415       | -0.161       | 0.300        | -0.181       | -0.052        | 0.237         | 0.869         | 0.898 | 0.925 |
| <b>wind10</b>             | -0.397       | -0.193       | -0.410       | -0.165       | 0.272        | -0.192       | -0.069        | 0.177         | 0.901         | 0.921 | 0.940 |
| <b>wind11</b>             | -0.390       | -0.167       | -0.398       | -0.151       | 0.280        | -0.182       | -0.074        | 0.171         | 0.940         | 0.952 | 0.943 |
| <b>wind12</b>             | -0.364       | -0.108       | -0.359       | -0.118       | 0.216        | -0.172       | -0.092        | 0.177         | 0.978         | 0.970 | 0.933 |
|                           | <b>wind4</b> | <b>wind5</b> | <b>wind6</b> | <b>wind7</b> | <b>wind8</b> | <b>wind9</b> | <b>wind10</b> | <b>wind11</b> | <b>wind12</b> |       |       |
| <b>Add_prop</b>           | -0.162       | -0.177       | -0.221       | -0.248       | -0.265       | -0.267       | -0.270        | -0.246        | -0.237        |       |       |
| <b>aspect</b>             | 0.001        | 0.001        | 0.001        | 0.001        | 0.001        | 0.001        | 0.001         | 0.001         | 0.001         |       |       |
| <b>T_swr</b>              | -0.092       | -0.103       | -0.117       | -0.095       | -0.071       | -0.027       | -0.005        | 0.015         | 0.005         |       |       |
| <b>T_bs</b>               | 0.083        | 0.070        | 0.048        | 0.037        | 0.034        | 0.036        | 0.056         | 0.052         | 0.037         |       |       |
| <b>T_bulk</b>             | -0.055       | -0.050       | -0.025       | -0.008       | -0.024       | -0.048       | -0.080        | -0.084        | -0.068        |       |       |
| <b>T_CaCO<sub>3</sub></b> | 0.190        | 0.191        | 0.198        | 0.210        | 0.166        | 0.105        | 0.045         | 0.036         | 0.038         |       |       |
| <b>T_CaCO<sub>4</sub></b> | 0.028        | 0.034        | 0.050        | 0.069        | 0.053        | 0.021        | -0.006        | -0.009        | -0.006        |       |       |
| <b>T_cec_clay</b>         | 0.273        | 0.279        | 0.259        | 0.221        | 0.217        | 0.230        | 0.242         | 0.233         | 0.216         |       |       |
| <b>T_cec_soil</b>         | 0.082        | 0.092        | 0.074        | 0.044        | 0.042        | 0.052        | 0.069         | 0.061         | 0.048         |       |       |
| <b>T_clay</b>             | -0.181       | -0.203       | -0.198       | -0.172       | -0.172       | -0.202       | -0.205        | -0.175        | -0.163        |       |       |
| <b>T_oc</b>               | 0.025        | 0.032        | 0.015        | -0.012       | -0.004       | 0.022        | 0.046         | 0.037         | 0.020         |       |       |
| <b>T_ece</b>              | 0.036        | 0.037        | 0.045        | 0.054        | 0.044        | 0.023        | 0.009         | 0.008         | 0.006         |       |       |
| <b>T_teb</b>              | 0.161        | 0.163        | 0.151        | 0.135        | 0.113        | 0.086        | 0.076         | 0.075         | 0.072         |       |       |
| <b>T_esp</b>              | 0.060        | 0.055        | 0.080        | 0.108        | 0.101        | 0.066        | 0.033         | 0.036         | 0.039         |       |       |
| <b>T_gravel</b>           | 0.158        | 0.182        | 0.213        | 0.218        | 0.194        | 0.165        | 0.115         | 0.085         | 0.103         |       |       |
| <b>T_sand</b>             | -0.046       | -0.047       | -0.033       | -0.018       | -0.001       | 0.018        | 0.021         | 0.014         | 0.001         |       |       |
| <b>T_silt</b>             | 0.211        | 0.229        | 0.206        | 0.163        | 0.138        | 0.136        | 0.134         | 0.119         | 0.128         |       |       |
| <b>T_texture</b>          | -0.095       | -0.106       | -0.102       | -0.089       | -0.104       | -0.135       | -0.142        | -0.121        | -0.103        |       |       |
| <b>bio1</b>               | -0.412       | -0.451       | -0.451       | -0.524       | -0.512       | -0.512       | -0.516        | -0.501        | -0.417        |       |       |
| <b>bio2</b>               | -0.340       | -0.355       | -0.363       | -0.408       | -0.408       | -0.399       | -0.430        | -0.432        | -0.414        |       |       |
| <b>bio3</b>               | 0.107        | 0.102        | 0.134        | 0.184        | 0.175        | 0.150        | 0.085         | 0.087         | 0.032         |       |       |
| <b>bio4</b>               | 0.111        | 0.135        | 0.109        | 0.073        | 0.060        | 0.065        | 0.090         | 0.066         | 0.044         |       |       |
| <b>bio5</b>               | -0.444       | -0.480       | -0.486       | -0.578       | -0.568       | -0.568       | -0.567        | -0.558        | -0.471        |       |       |
| <b>bio6</b>               | -0.373       | -0.412       | -0.403       | -0.454       | -0.440       | -0.444       | -0.453        | -0.434        | -0.355        |       |       |
| <b>bio7</b>               | 0.007        | 0.028        | -0.004       | -0.056       | -0.070       | -0.061       | -0.040        | -0.064        | -0.081        |       |       |
| <b>bio8</b>               | -0.415       | -0.449       | -0.461       | -0.559       | -0.544       | -0.533       | -0.526        | -0.520        | -0.433        |       |       |
| <b>bio9</b>               | -0.320       | -0.352       | -0.336       | -0.374       | -0.368       | -0.383       | -0.402        | -0.385        | -0.320        |       |       |
| <b>bio10</b>              | -0.435       | -0.471       | -0.477       | -0.568       | -0.558       | -0.558       | -0.556        | -0.546        | -0.457        |       |       |
| <b>bio11</b>              | -0.385       | -0.423       | -0.415       | -0.469       | -0.456       | -0.459       | -0.468        | -0.450        | -0.372        |       |       |
| <b>bio12</b>              | -0.335       | -0.360       | -0.377       | -0.384       | -0.370       | -0.353       | -0.357        | -0.343        | -0.305        |       |       |
| <b>bio13</b>              | -0.357       | -0.370       | -0.380       | -0.382       | -0.371       | -0.364       | -0.385        | -0.378        | -0.356        |       |       |
| <b>bio14</b>              | -0.185       | -0.224       | -0.241       | -0.262       | -0.245       | -0.220       | -0.202        | -0.172        | -0.111        |       |       |
| <b>bio15</b>              | 0.100        | 0.124        | 0.165        | 0.251        | 0.238        | 0.206        | 0.144         | 0.137         | 0.067         |       |       |
| <b>bio16</b>              | -0.369       | -0.384       | -0.396       | -0.401       | -0.391       | -0.381       | -0.397        | -0.390        | -0.364        |       |       |
| <b>bio17</b>              | -0.176       | -0.213       | -0.233       | -0.252       | -0.236       | -0.210       | -0.193        | -0.167        | -0.108        |       |       |
| <b>bio18</b>              | -0.377       | -0.406       | -0.431       | -0.457       | -0.441       | -0.415       | -0.410        | -0.398        | -0.359        |       |       |
| <b>bio19</b>              | -0.150       | -0.173       | -0.185       | -0.183       | -0.172       | -0.161       | -0.165        | -0.151        | -0.118        |       |       |
| <b>dem</b>                | 0.206        | 0.220        | 0.230        | 0.314        | 0.298        | 0.300        | 0.272         | 0.280         | 0.216         |       |       |



|                 |        |        |        |        |        |        |        |        |        |
|-----------------|--------|--------|--------|--------|--------|--------|--------|--------|--------|
| <b>human</b>    | -0.115 | -0.119 | -0.141 | -0.160 | -0.173 | -0.181 | -0.192 | -0.182 | -0.172 |
| <b>slope</b>    | -0.055 | -0.052 | -0.059 | -0.052 | -0.056 | -0.052 | -0.069 | -0.074 | -0.092 |
| <b>T_pH_H2O</b> | 0.289  | 0.294  | 0.317  | 0.332  | 0.301  | 0.237  | 0.177  | 0.171  | 0.177  |
| <b>wind1</b>    | 0.899  | 0.859  | 0.854  | 0.825  | 0.845  | 0.869  | 0.901  | 0.940  | 0.978  |
| <b>wind2</b>    | 0.943  | 0.902  | 0.895  | 0.868  | 0.880  | 0.898  | 0.921  | 0.952  | 0.970  |
| <b>wind3</b>    | 0.981  | 0.956  | 0.942  | 0.913  | 0.918  | 0.925  | 0.940  | 0.943  | 0.933  |
| <b>wind4</b>    | 1.000  | 0.984  | 0.966  | 0.927  | 0.930  | 0.934  | 0.941  | 0.931  | 0.899  |
| <b>wind5</b>    | 0.984  | 1.000  | 0.982  | 0.956  | 0.948  | 0.946  | 0.946  | 0.914  | 0.862  |
| <b>wind6</b>    | 0.966  | 0.982  | 1.000  | 0.968  | 0.965  | 0.948  | 0.941  | 0.911  | 0.859  |
| <b>wind7</b>    | 0.927  | 0.956  | 0.968  | 1.000  | 0.982  | 0.965  | 0.943  | 0.904  | 0.834  |
| <b>wind8</b>    | 0.930  | 0.948  | 0.965  | 0.982  | 1.000  | 0.983  | 0.952  | 0.915  | 0.849  |
| <b>wind9</b>    | 0.934  | 0.946  | 0.948  | 0.965  | 0.983  | 1.000  | 0.969  | 0.938  | 0.875  |
| <b>wind10</b>   | 0.941  | 0.946  | 0.941  | 0.943  | 0.952  | 0.969  | 1.000  | 0.976  | 0.922  |
| <b>wind11</b>   | 0.931  | 0.914  | 0.911  | 0.904  | 0.915  | 0.938  | 0.976  | 1.000  | 0.965  |
| <b>wind12</b>   | 0.899  | 0.862  | 0.859  | 0.834  | 0.849  | 0.875  | 0.922  | 0.965  | 1.000  |

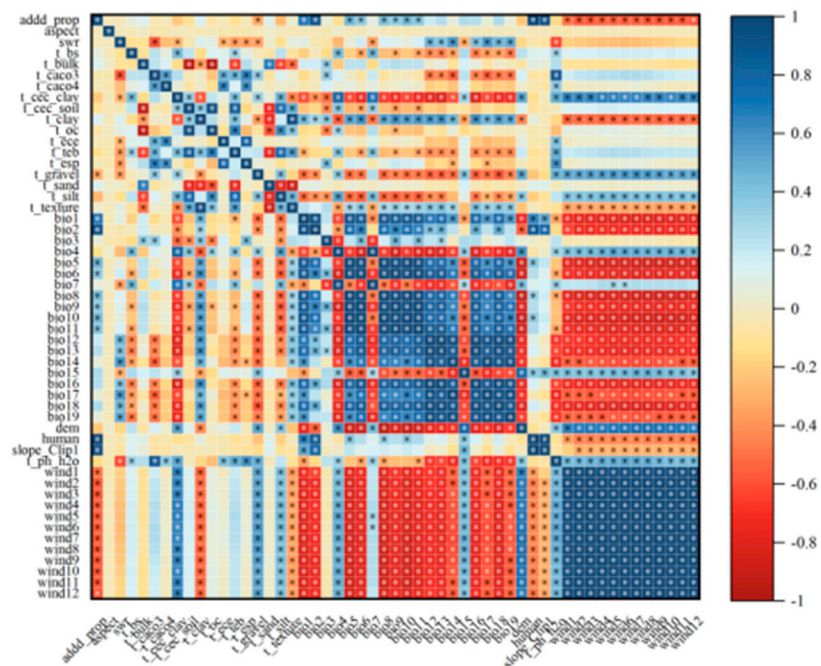

**Supplementary Figure S1.** Relation between 53 environmental variables

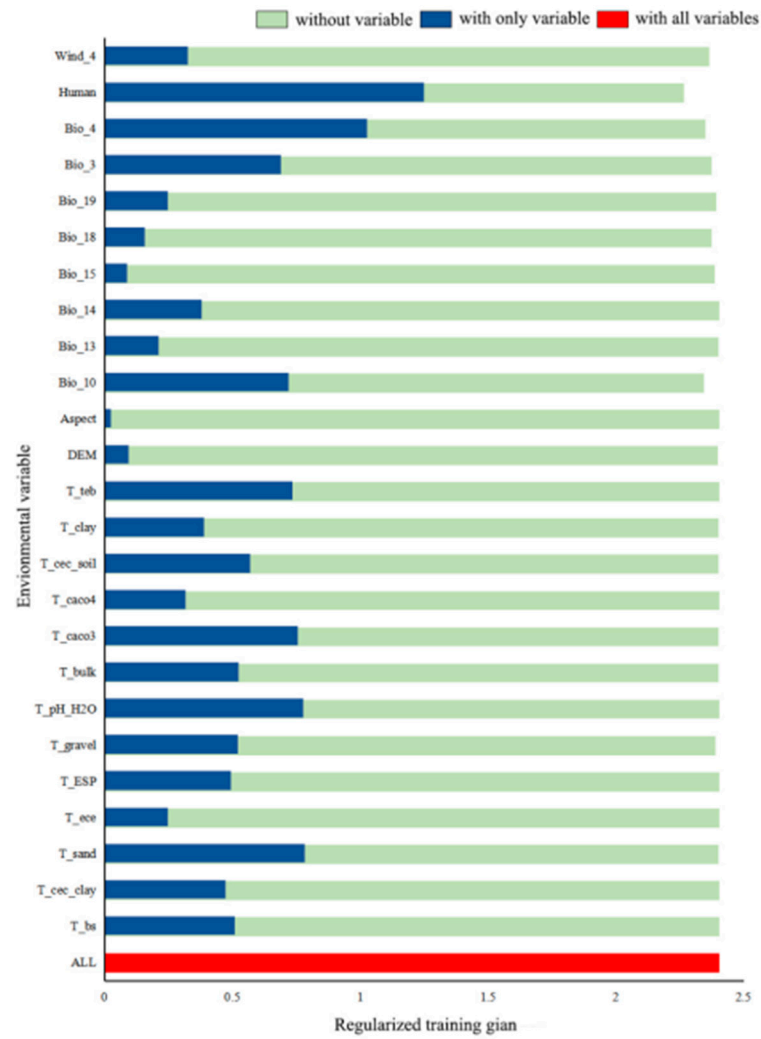

**Supplementary Figure S2.** Importance of environmental variables of *Amaranthus palmeri* by “Jackknife method”

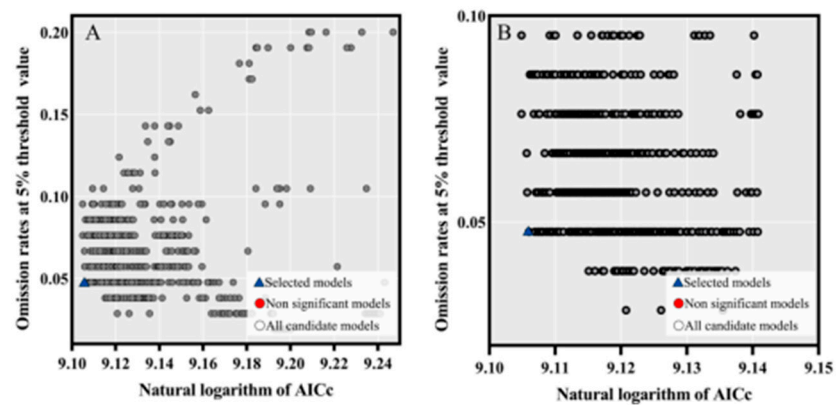

**Supplementary Figure S3.** The best model was chosen from a pool of 1160 candidate models

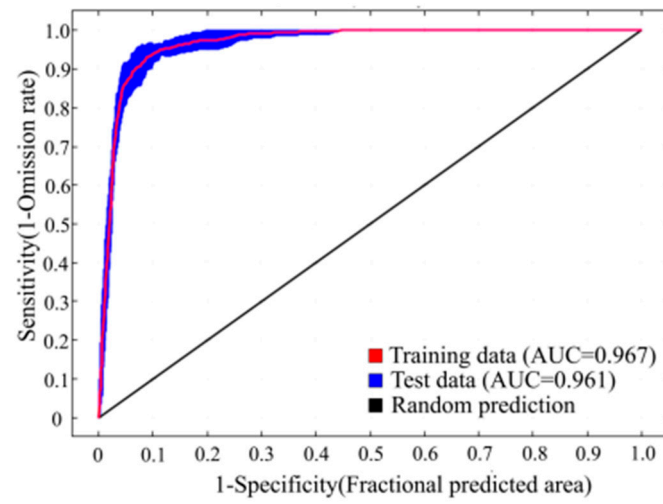

**Supplementary Figure S4.** The MaxEnt model calibration and AUC of *Amaranthus palmeri*
